# Supplementary material for: Is a fully wrapped SSB–DNA complex essential for Escherichia coli survival?
Source: PubMed Central journal article supplement — Nucleic Acids Res. 2016 Apr 15;44(9):4317–29. doi: 10.1093/nar/gkw262 (PMC4872115; doi:10.1093/nar/gkw262), 2016-04-15
Supplement: supp_gkw262_nar-00122-h-2016-File009.pdf [file supp_gkw262_nar-00122-h-2016-File009.pdf]

## SUPPLEMENTARY FIGURES

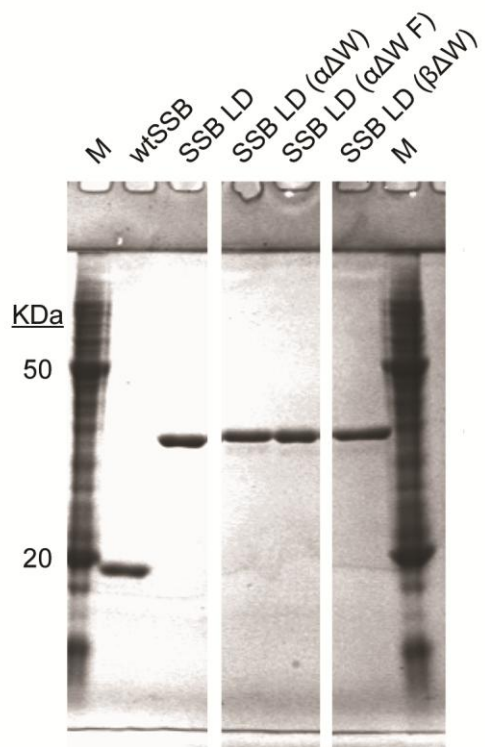

**Figure S1:** SDS-PAGE analysis of purified wtSSB, SSB LD, SSB LD ( $\alpha\Delta W$ ), SSB LD ( $\alpha\Delta W$  F) and SSB LD ( $\beta\Delta W$ ). We analyzed 12  $\mu$ l of 1.5  $\mu$ M protein stocks on a 12% SDS-PAGE gel.

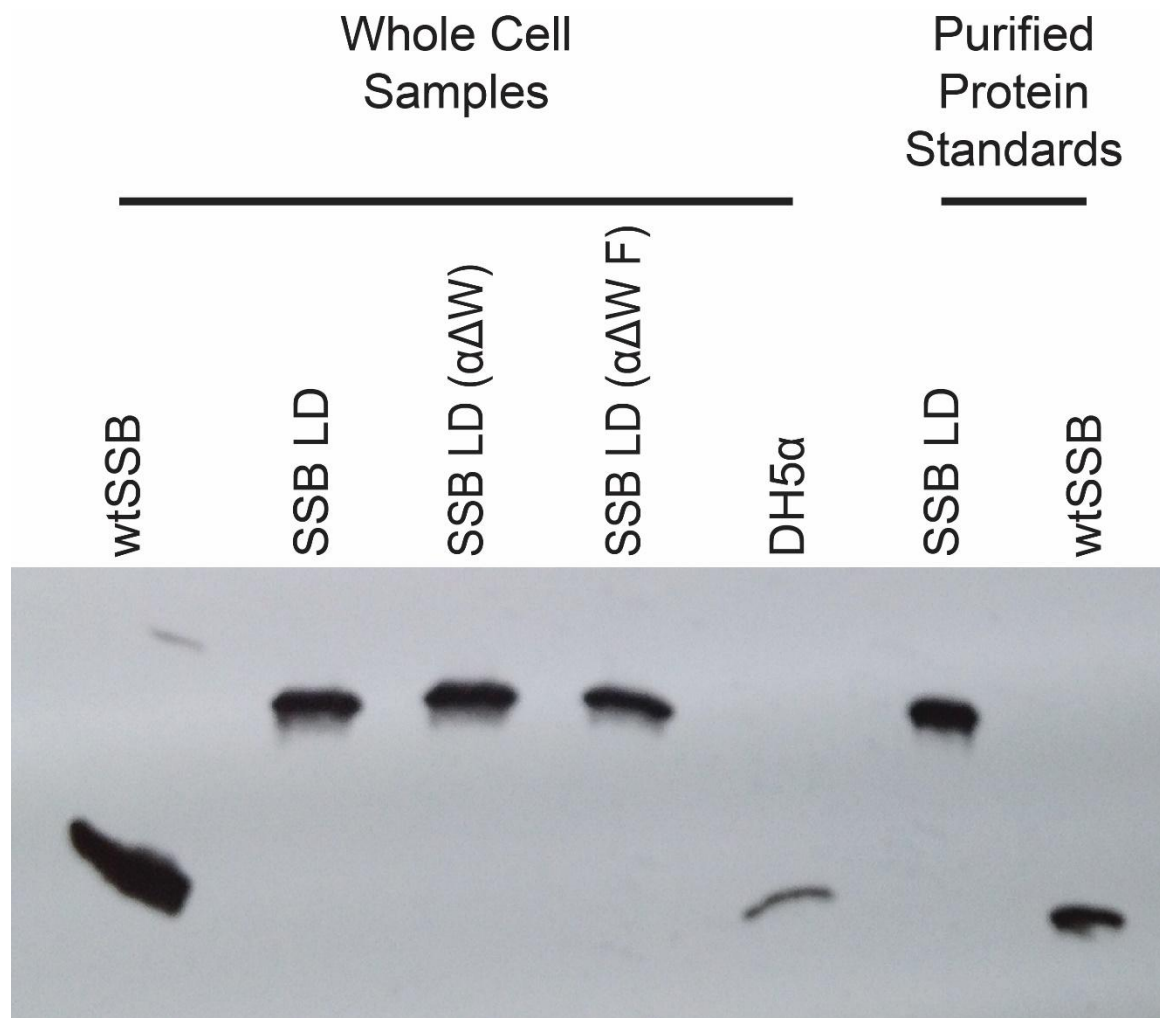

**Figure S2:** Anti-SSB western blot analysis. (*Left four lanes*) Whole cell extracts of RDP317 cells that have been cured of the helper plasmid expressing wtSSB that express the SSB variants listed from the secondary plasmid. (*Fifth lane*) Whole cell extract of the DH5α strain was used as a standard for genomic expression of wtSSB. (*Right two lanes*) Purified SSB LD and wtSSB were used as molecular weight standards.
